# Supplementary material
Source: Springer Nature journal article supplement (https://www.springermedizin.de/resource/supplementary/12936_2006_281_MOESM2_ESM.pdf/9547088)

173Qs

173Qu

173u

173b

M

Qs -

Qu -

u -

b -

3D7

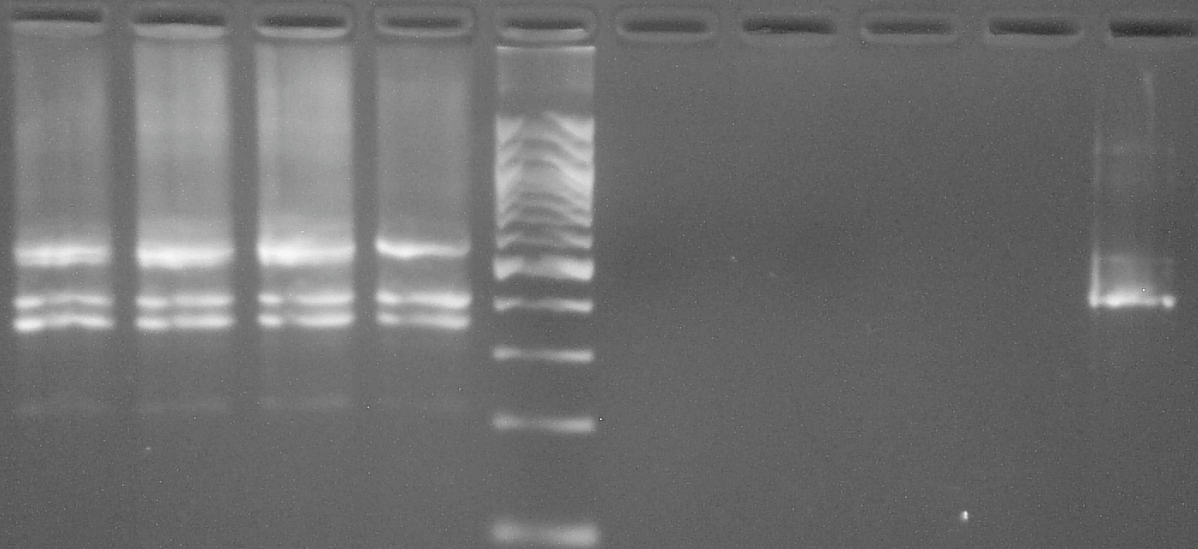

Supplement: MOESM2 [file 9547088]
